# Supplementary material for: Survival motor neuron gene 2 silencing by DNA methylation correlates with spinal muscular atrophy disease severity and can be bypassed by histone deacetylase inhibition
Source: PubMed Central journal article supplement — Hum Mol Genet. 2008 Oct 29;18(2):304–17. doi: 10.1093/hmg/ddn357 (PMC2638778; doi:10.1093/hmg/ddn357), 2008-10-29
Supplement: ddn357_1.pdf [file ddn357_1.pdf]

**Supplementary Figure 1: Expression of total *SMN2* and *LT-SMN2* transcripts in tissues derived from adult *Smn*<sup>-/-</sup> *SMN2*<sup>+/+</sup> transgenic mice.** Comparison of *SMN2* (**A**) and *LT-SMN2* (**B**) transcript levels in two neuronal and three nonneuronal tissues derived from adult *Smn*<sup>-/-</sup> *SMN2*<sup>+/+</sup> mice. In both analyses, *SMN2* (**A**) and *LT-SMN2* (**B**) transcript levels in skeletal muscle were set to 100%.

**Supplementary Figure 2: The *SMN1* methylation patterns in blood samples derived from *SMN2*-deleted and unaffected individuals.** (A) Bar chart shows the mean methylation levels ( $\pm$  SEM) of each CpG dinucleotide within the respective *SMN1* CGIs in DNA isolated from blood samples drawn from 6 unaffected, *SMN2*-deleted individuals carrying 2 *SMN1* copies (4 female, 2 male). The mean methylation levels of each *SMN1* CGI (see frequency plot) are as follows: *SMN1* CGI 1: 87.0%, *SMN1* CGI 2: 54.0%, *SMN1* CGI 3: 8.2%, *SMN1* CGI 4: 77.6%; (B) Bar chart shows the difference of DNA methylation levels at each CpG dinucleotide within CGI 2 in unaffected *SMN2*-deleted individuals compared with *SMN1*-deleted type I and type III SMA patients. At nt position -330, *SMN1* shows significantly higher methylation levels compared with type I *SMN2* and type III *SMN2* epialleles, while the *SMN1* methylation at nt position -258 is significantly lower. At nt position -296, *SMN1* shows lower methylation levels compared with type I *SMN2*, and higher levels compared with type III *SMN2* epialleles. Three levels of statistical significance were discriminated: \* =  $p < 0.05$ , \*\* =  $p < 0.01$ , \*\*\* =  $p < 0.001$  (*t*-test).

**A**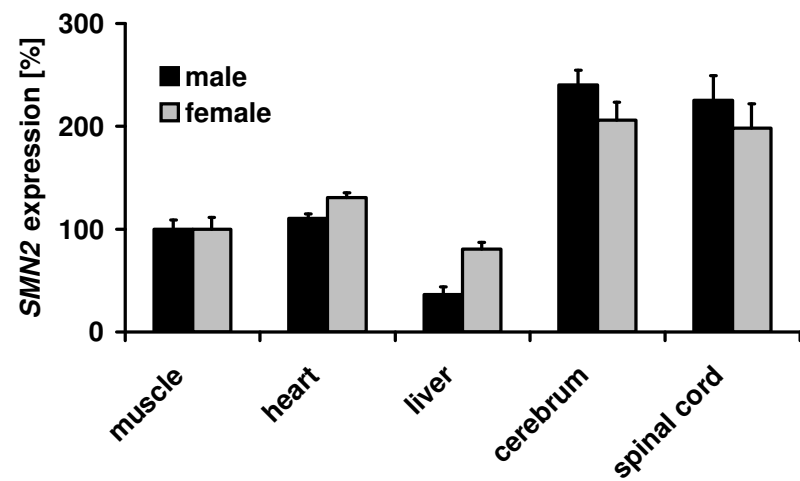**B**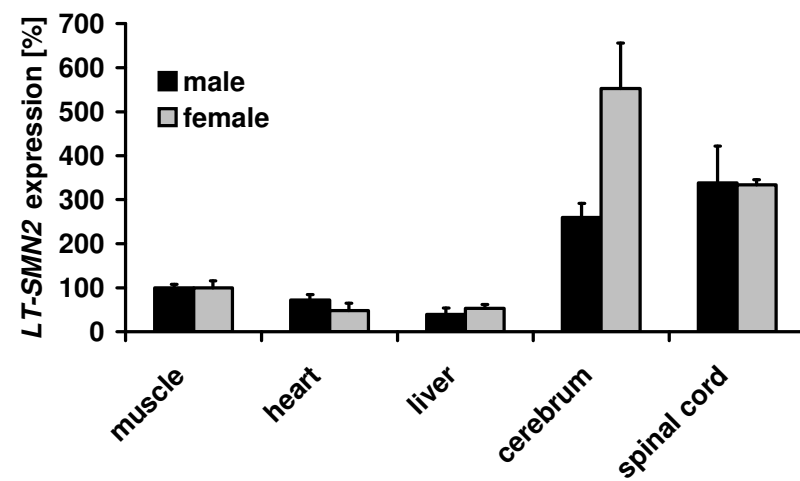

Supplementary Figure 1

**A**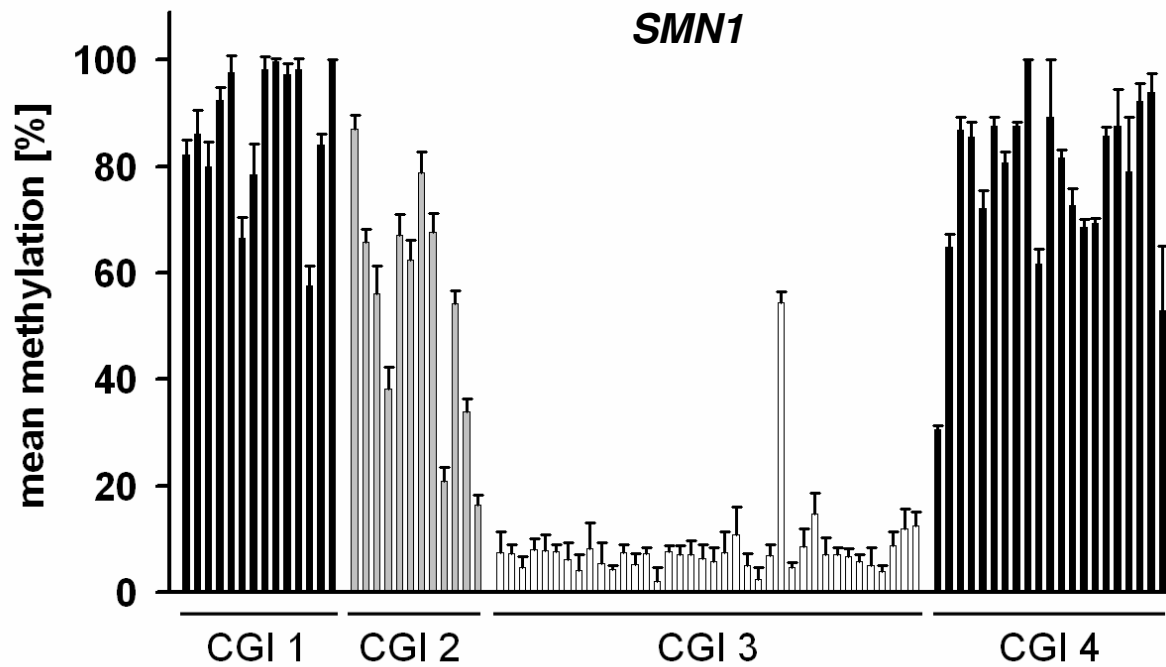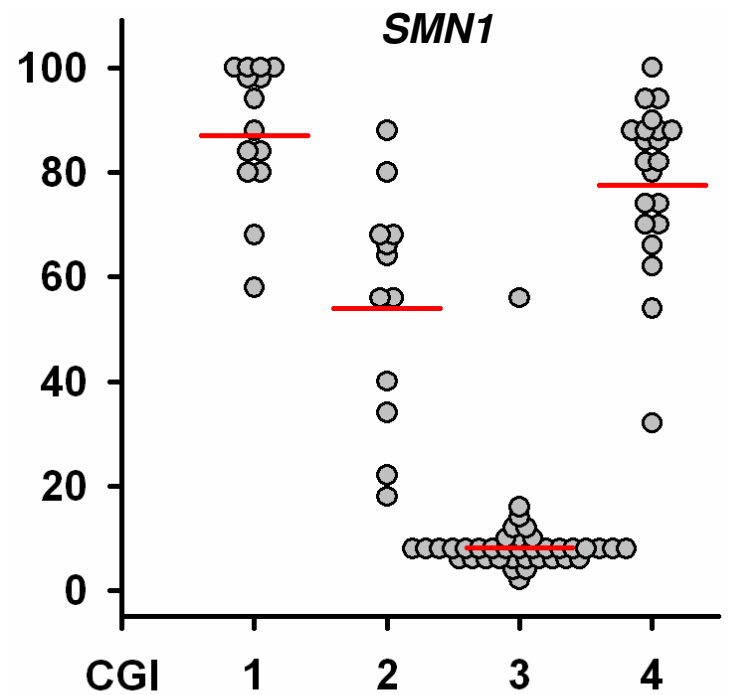**B**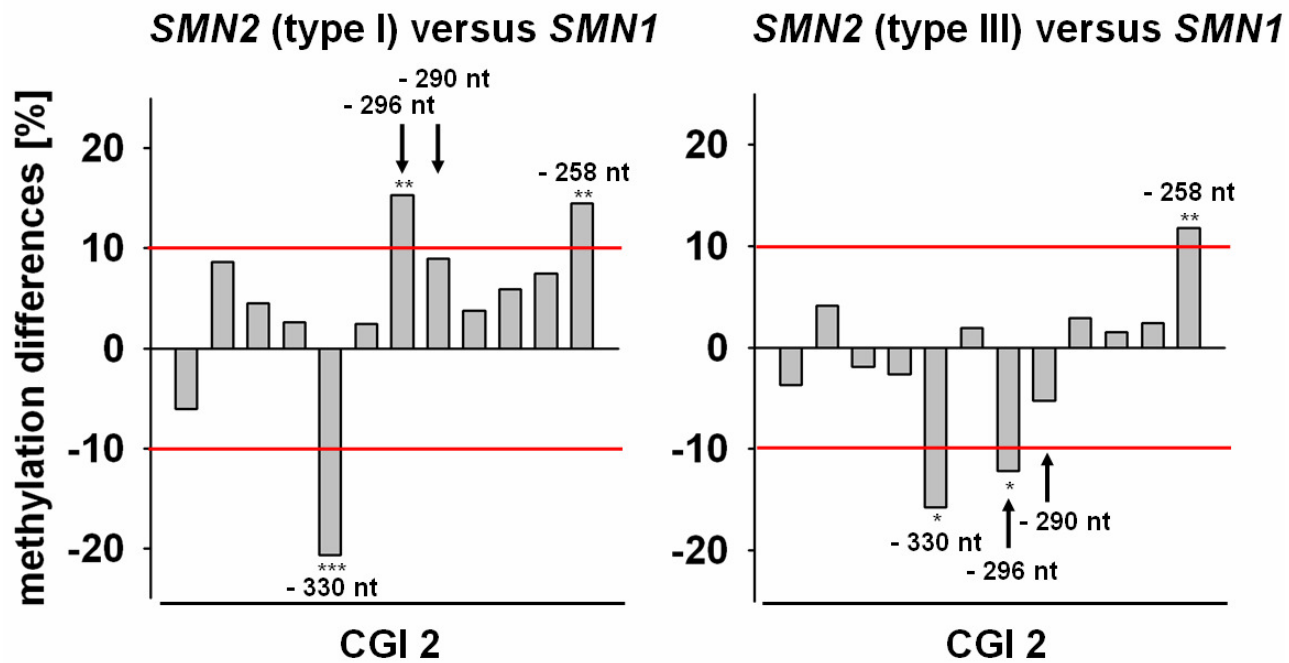

## Primers used for bisulfite genomic sequencing

|                         | name                             | sequence                                  |
|-------------------------|----------------------------------|-------------------------------------------|
| <b>CGI 1</b>            | CGI 1 outer fwd                  | 5'-GAT GTT TAA TAA AGA ATA TTG GAG-3'     |
|                         | CGI 1 outer rev                  | 5'-AAA TAT TTA ATC CCC CAA CCT TA-3'      |
|                         | CGI 1 inner 1 fwd                | 5'-GTT TAA TAA AGA ATA TTG GAG GTT-3'     |
|                         | CGI 1 inner 1 rev Bio            | 5'-Bio-CTC TAT CAC CCA AAC TAA AAT AC-3'  |
|                         | CGI 1 inner 2 fwd                | 5'-GTA TTT TAG TTT GGG TGA TAG AG-3'      |
|                         | CGI 1 inner 2 rev Bio            | 5'-Bio-TTA ATC CCC CAA CCT TAT TTA TTA-3' |
|                         | seqprimer CGI 1 1.1 fwd          | 5'-GTT TAA TAA AGA ATA TTG GAG GTT-3'     |
|                         | seqprimer CGI 1 1.2 fwd          | 5'-GGT TTG GTG TGG TGG TTT ATA TT-3'      |
|                         | seqprimer CGI 1 1.3 fwd          | 5'-TTA AAA ATA TAA AAA TTA GT-3'          |
|                         | seqprimer CGI 1 2.1 fwd          | 5'-GTA TTT TAG TTT GGG TGA TAG AG-3'      |
|                         | seqprimer CGI 1 2.2 fwd          | 5'-AGT ATT TTG GGA TGT TAG AG-3'          |
|                         | seqprimer CGI 1 2.3 fwd          | 5'-GGA ATA TTT TGA GTT TAG GAG TT-3'      |
|                         | seqprimer CGI 1 2.4 fwd          | 5'-GTG TTT TTG TGG TTT TAG TTA-3'         |
|                         | seqprimer CGI 1 2.5 fwd          | 5'-ATG GTG TTA TTG TAT TTT G-3'           |
|                         | <b>CGI 2</b>                     | CGI 2 outer fwd                           |
| CGI 2 outer rev         |                                  | 5'-ATA ATT ATC RCC CTC CCA CAT TTA-3'     |
| CGI 2 inner1 fwd        |                                  | 5'-AGA YGA GGT TTA AGT AAT ATG T-3'       |
| CGI 2 inner2 rev Bio    |                                  | 5'-Bio-CTC AAT CCT TTC ATT TCA CTA TA-3'  |
| seqprimer CGI 2 1.1 fwd |                                  | 5'-AGA YGA GGT TTA AGT AAT ATG T-3'       |
| seqprimer CGI 2 1.2 fwd |                                  | 5'-AAA TAG TTG AGY GTG GTG-3'             |
| seqprimer CGI 2 1.3 fwd |                                  | 5'-AGG TTG AGG TGG GAG GAT-3'             |
| seqprimer CGI 2 1.4 fwd |                                  | 5'-AAG TYG AGG TTG TAG TGA GT-3'          |
| seqprimer CGI 2 1.5 fwd | 5'-TTG TAT TTT AGT TTG AG-3'     |                                           |
| <b>CGI 3</b>            | CGI 3 outer fwd                  | 5'-GTG AAA TGA AAG GAT TGA GAG A-3'       |
|                         | CGI 3 outer rev                  | 5'-CTC CCC CAC ACC AAC CAA AA-3'          |
|                         | CGI 3 inner1 fwd                 | 5'-Bio-TAA ATG TGG GAG GGY GAT AAT TAT-3' |
|                         | CGI 3 inner1 rev                 | 5'-CTA CRA CCT CAC CTA ACC TAT A-3'       |
|                         | CGI 3 inner2A fwd                | 5'-GTA TAG GTT AGG TGA GGT YGT AG-3'      |
|                         | CGI 3 inner2A rev Bio            | 5'-Bio-ATA AAC AAA ATA AAC TAC TA-3'      |
|                         | CGI 3 inner2B fwd Bio            | 5'-Bio-GTA TAG GTT AGG TGA GGT YGT AG-3'  |
|                         | CGI 3 inner2B rev                | 5'-ATA AAC AAA ATA AAC TAC TA-3'          |
|                         | seqprimer CGI 3 1.1 fwd          | 5'-TAA ATG TGG GAG GGT GAT-3'             |
|                         | seqprimer CGI 3 1.2 fwd          | 5'-GTA GAA AGC GTG AGA AGT TAT TAT-3'     |
|                         | seqprimer CGI 3 1.3 fwd          | 5'-GTT TYG TTT TTA GAA GTT T-3'           |
|                         | seqprimer CGI 3 1.4 fwd          | 5'-GTY GTT ATT TTT AAG AAG GG-3'          |
|                         | seqprimer CGI 3 1.5 fwd          | 5'-TTG TTA TGG YGA TGA GTA-3'             |
|                         | seqprimer CGI 3 1.6 fwd          | 5'-GAG TAG GAG GAT TTY GTG TT-3'          |
|                         | seqprimer CGI 3 2.1 fwd          | 5'-GTG TAG TTT TTT TAT TA-3'              |
| seqprimer CGI 3 2.2 rev | 5'-AAC CAC AAC TCC AAT AAA-3'    |                                           |
| seqprimer CGI 3 2.3 fwd | 5'-TTT ATT GGA GTT GTG GTT-3'    |                                           |
| seqprimer CGI 3 2.4 rev | 5'-CTA TCA AAA AAC CCA AAC TA-3' |                                           |
| seqprimer CGI 3 2.5 rev | 5'-ATA AAC AAA ATA AAC TAC TA-3' |                                           |
| <b>CGI 4</b>            | CGI 4 outer fwd                  | 5'-GTG GTT TTA GTT ATT TGG AAG-3'         |
|                         | CGI 4 outer rev                  | 5'-CTA CCA TAA ACT AAA ATC ATA CC-3'      |
|                         | CGI 4 inner1A fwd                | 5'-GTT TAG GGA GGT GGA GGT TGT-3'         |

|                         |                                         |
|-------------------------|-----------------------------------------|
| CGI 4 inner1A rev Bio   | 5'-Bio-TAT TAA CCA AAA TAA TCT-3'       |
| CGI 4 inner1B fwd Bio   | 5'-Bio-GTT TAG GGA GGT GGA GGT TGT-3'   |
| CGI 4 inner1B rev       | 5'-TAT TAA CCA AAA TAA TCT-3'           |
| CGI 4 inner2A fwd       | 5'-AGA TTA TTT TGG TTA ATA-3'           |
| CGI 4 inner2A rev Bio   | 5'-Bio-CCA CTA TAC TCC AAC CTA AAC C-3' |
| CGI 4 inner2B fwd Bio   | 5'-Bio-AGA TTA TTT TGG TTA ATA-3'       |
| CGI 4 inner2B rev       | 5'-CCA CTA TAC TCC AAC CTA AAC C-3'     |
| seqprimer CGI 4 1.1 fwd | 5'-GTT TAG GGA GGT GGA GGT TGT-3'       |
| seqprimer CGI 4 1.2 fwd | 5'-TGT TTT AAA ATA AAA TAA-3'           |
| seqprimer CGI 4 1.3 fwd | 5'-AAG TTT GTA ATT TTA GTA-3'           |
| seqprimer CGI 4 2.1 fwd | 5'-AGA TTA TTT TGG TT-3'                |
| seqprimer CGI 4 2.2 rev | 5'-CTT CAT AAC ATT CTC CTA-3'           |
| seqprimer CGI 4 2.3 fwd | 5'-TAG GAG AAT GTT ATG AAG-3'           |
| seqprimer CGI 4 2.4 fwd | 5'-TTA TTG TAT TTT AGT TTG GG-3'        |
| seqprimer CGI 4 2.5 rev | 5'-ATT CCT TAA AAT ATA CCTA-3'          |
| seqprimer CGI 4 2.6 rev | 5'-CTA TAC TCC AAC CTA AAC CAC AA-3'    |

#### Primers used for *SMN2* CGI cloning (results shown in Figure 2 C)

|              | name                   | sequence                              |
|--------------|------------------------|---------------------------------------|
| <b>CGI 1</b> | CGI1 cloning fwd       | 5'-TGT AAT TTT AGT ATT TTG GGA GGT-3' |
|              | CGI1 cloning rev       | 5'-TTA ATC CCC CAA CCT TAT TTA TTA-3' |
| <b>CGI 2</b> | CGI2 cloning fwd       | 5'-GAG TTY GAG AYG AGG TTT AAG T-3'   |
|              | CGI2 cloning rev       | 5'-CTA CGA CCT CAC CTA ACC TAT A-3'   |
| <b>CGI 3</b> | CGI3 cloning fwd       | 5'-TAA ATG TGG GAG GGC GAT AAT TAT-3' |
|              | CGI3 cloning rev       | 5'-AAA AAT AAA CAA AAT AAA CTA CTA-3' |
| <b>CGI 4</b> | CGI4 cloning outer fwd | 5'-TAG TTA TTT GGA AGG TTT AGG TT-3'  |
|              | CGI4 cloning outer rev | 5'-ATA ACT CAC TCC TTT AAA CCC AA-3'  |
|              | CGI4 cloning inner fwd | 5'-GTT TAG GGA GGT GGA GGT TGT-3'     |
|              | CGI4 cloning inner rev | 5'-CCA CTA TAC TCC AAC CTA AAC C-3'   |

#### Primers used for ChIP analyses (results shown in Figure 7 E, F, G)

| name             | sequence                              |
|------------------|---------------------------------------|
| -631 to -524 fwd | 5'-GTG TTT AAG GAT CTG CCG CCT-3'     |
| -631 to -524 rev | 5'-GTA AAT GTA AGC TCC TAC TAG GAA-3' |
| -609 to -487 fwd | 5'-CCT TCC TGC CCC CAT GTT TGT-3'     |
| -609 to -487 rev | 5'-TGT GTG TAG ATA TTT ATT CCC C-3'   |
| -449 to -349 fwd | 5'-GTT CGA GAC GAG GCC TAA GCA-3'     |

|                  |                                       |
|------------------|---------------------------------------|
| -449 to -349 rev | 5'-CCC CAG TAG CTA GGA CTA TAG GCG-3' |
| -372 to -266 fwd | 5'-CGC CTA TAG TCC TAG CTA CTG GG-3'  |
| -372 to -266 rev | 5'-GCT CAG GCT GGA GTG CAG C-3'       |
| -167 to -43 fwd  | 5'-CAC GCC ACA AAT GTG GGA GG-3'      |
| -167 to -43 rev  | 5'-AAG AGT GAC GAC TTC CGC CG-3'      |
| -63 to +59 fwd   | 5'-CGG CGG AAG TCG TCA CTC TT-3'      |
| -63 to +59 rev   | 5'-CAG CAC GGA ATC CTC CTG CT-3'      |
